# Supplementary material for: Ex Vivo Shear-Wave Elastography of Axillary Lymph Nodes to Predict Nodal Metastasis in Patients with Primary Breast Cancer
Source: PubMed Central journal article supplement — J Breast Cancer. 2018 Jun 20;21(2):190–6. doi: 10.4048/jbc.2018.21.2.190 (PMC6015987; doi:10.4048/jbc.2018.21.2.190), 2018-06-20
Supplement: jbc-21-190-s001.pdf [file jbc-21-190-s001.pdf]

**Supplementary Table 1.** Comparison of *ex vivo* SWE values and characteristics between nonmetastatic and metastatic axillary lymph nodes

| Characteristic               | Nonmetastatic lymph nodes*<br>(n=187) | Metastatic lymph nodes<br>(n=41) | 95% CI      | p-value |
|------------------------------|---------------------------------------|----------------------------------|-------------|---------|
| Size of node (mm)            | 7.52±3.58                             | 10.50±4.77                       | 1.091–1.288 | <0.001  |
| Metastatic size of node (mm) | 0.07±0.32                             | 9.30±5.08                        | -           | -       |
| Mean stiffness (kPa)         | 17.69±12.23                           | 45.41±31.59                      | 1.043–1.089 | <0.001  |
| Max stiffness (kPa)          | 23.23±15.98                           | 55.34±35.03                      | 1.034–1.070 | <0.001  |
| Ratio                        | 1.57±0.98                             | 4.36±4.93                        | 1.763–3.085 | <0.001  |

Data are presented as mean±SD.

SWE= shear-wave elastography; CI= confidence interval.

\*Nonmetastatic lymph nodes include micro-metastasis.
