# Supplementary material for: Ex Vivo Shear-Wave Elastography of Axillary Lymph Nodes to Predict Nodal Metastasis in Patients with Primary Breast Cancer
Source: PubMed Central journal article supplement — J Breast Cancer. 2018 Jun 20;21(2):190–6. doi: 10.4048/jbc.2018.21.2.190 (PMC6015987; doi:10.4048/jbc.2018.21.2.190), 2018-06-20
Supplement: jbc-21-190-s002.pdf [file jbc-21-190-s002.pdf]

**Supplementary Table 2.** Diagnostic value of SWE values, including mean stiffness, node size, max stiffness, and ratio

| Characteristic       | Cutoff point | TP | TN  | FP | FN | SN (95% CI)      | SP (95% CI)      | Accuracy (95% CI) | PPV (95% CI)     | NPV (95% CI)     |
|----------------------|--------------|----|-----|----|----|------------------|------------------|-------------------|------------------|------------------|
| Mean stiffness (kPa) | >30.6        | 24 | 170 | 17 | 17 | 58.5 (43.5–73.6) | 90.9 (86.8–95.0) | 85.1 (80.5–89.7)  | 58.5 (43.5–73.6) | 89.3 (84.3–94.2) |
| Node size (mm)       | >8.9         | 25 | 133 | 54 | 16 | 60.1 (46.0–75.9) | 71.1 (64.6–77.6) | 69.3 (63.3–75.3)  | 31.7 (21.4–41.9) | 89.3 (84.3–94.2) |
| Max stiffness (kPa)  | >38.6        | 24 | 168 | 19 | 17 | 58.5 (43.5–73.6) | 89.8 (85.5–94.2) | 84.2 (79.5–88.9)  | 55.8 (41.0–70.7) | 90.8 (86.6–95.0) |
| Ratio                | >2.37        | 29 | 166 | 21 | 12 | 70.7 (56.8–84.7) | 88.8 (84.2–93.3) | 85.5 (81.0–90.1)  | 58.0 (44.3–71.7) | 93.3 (89.6–96.9) |

SWE=shear-wave elastography; TP=true positives; TN=true negatives; FP=false positives; FN=false negatives; SN=sensitivity; CI=confidence interval; SP=specificity; PPV=positive predictive value; NPV=negative predictive value.
