# Supplementary material for: Ex Vivo Shear-Wave Elastography of Axillary Lymph Nodes to Predict Nodal Metastasis in Patients with Primary Breast Cancer
Source: PubMed Central journal article supplement — J Breast Cancer. 2018 Jun 20;21(2):190–6. doi: 10.4048/jbc.2018.21.2.190 (PMC6015987; doi:10.4048/jbc.2018.21.2.190), 2018-06-20
Supplement: jbc-21-190-s003.pdf [file jbc-21-190-s003.pdf]

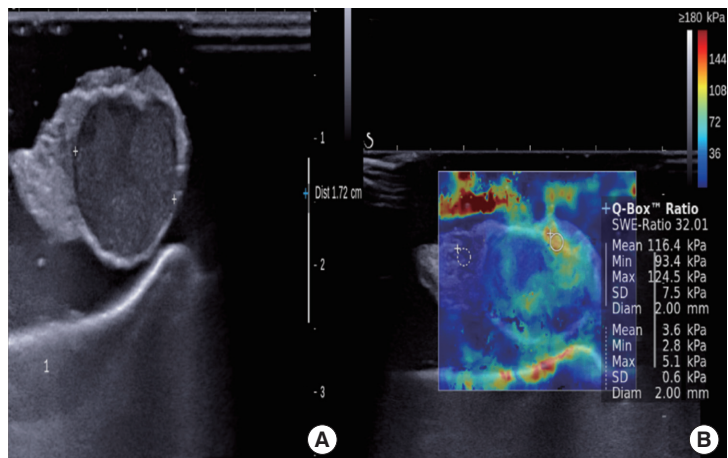

**Supplementary Figure 1.** B-mode ultrasound and shear-wave elastography (SWE). (A) B-mode ultrasound showed 1.72-cm sized excised axillary lymph node with adjacent fat tissue. (B) The mean and max stiffness were measured by placing the 2-mm sized region-of-interest (ROI) over the stiffest part of the excised axillary lymph node (circle). The elasticity ratio of the axillary lymph node to the adjacent fat tissue was measured by placing another ROI on the surrounding fat tissue (dotted circle).
