# Supplementary material for: Ex Vivo Shear-Wave Elastography of Axillary Lymph Nodes to Predict Nodal Metastasis in Patients with Primary Breast Cancer
Source: PubMed Central journal article supplement — J Breast Cancer. 2018 Jun 20;21(2):190–6. doi: 10.4048/jbc.2018.21.2.190 (PMC6015987; doi:10.4048/jbc.2018.21.2.190), 2018-06-20
Supplement: jbc-21-190-s005.pdf [file jbc-21-190-s005.pdf]

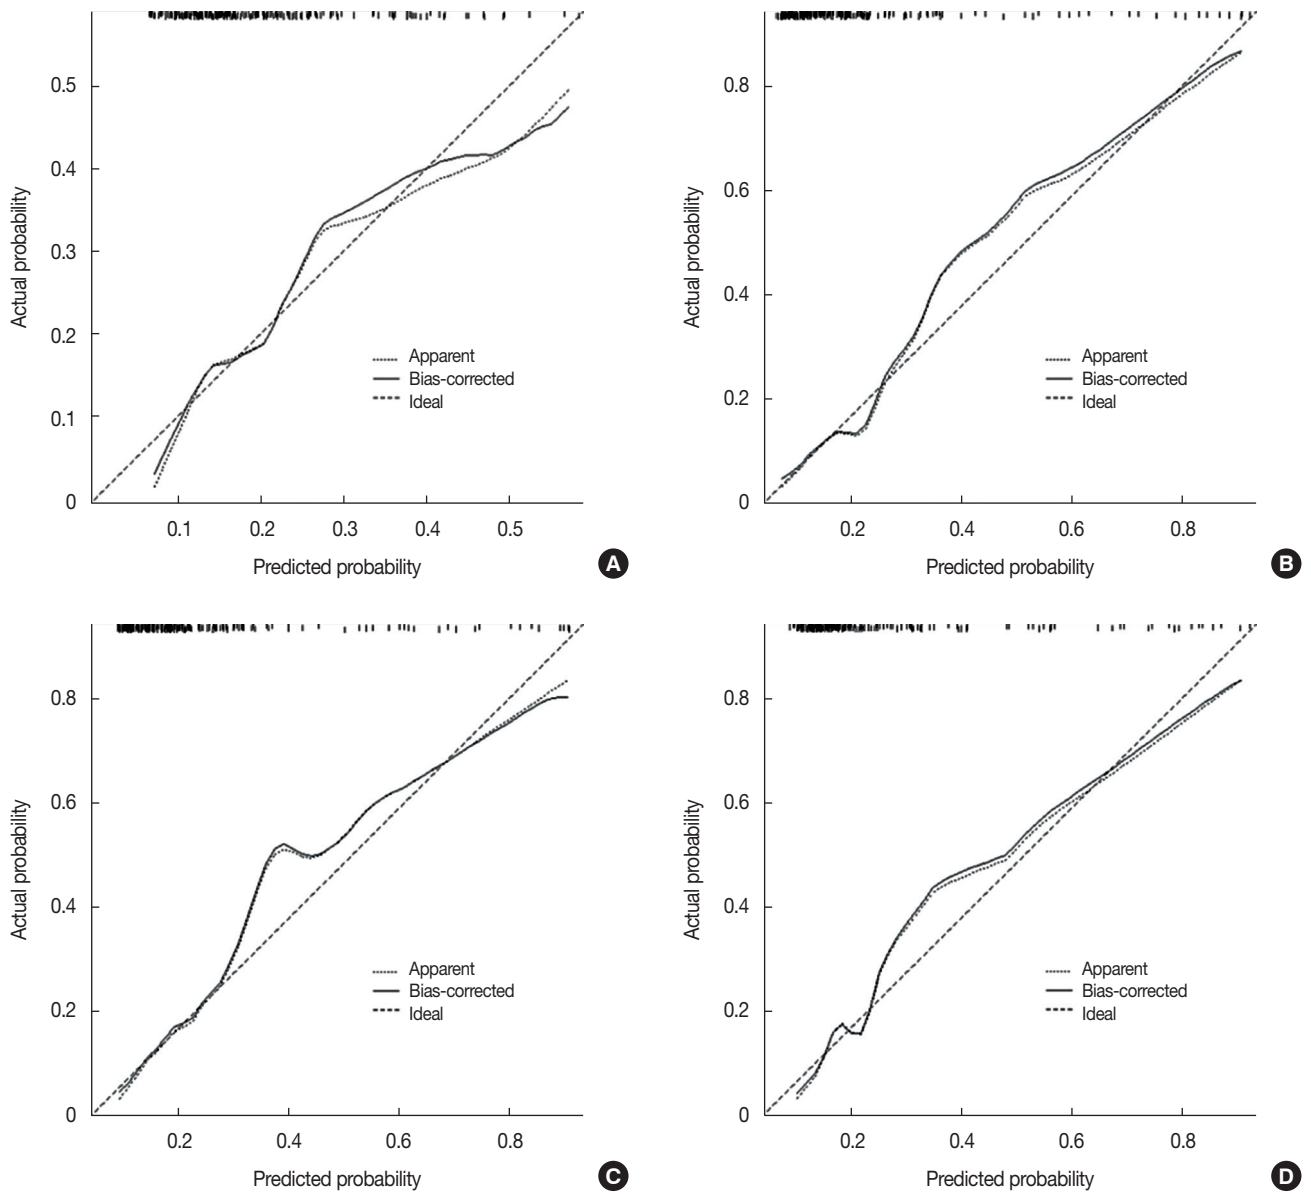

**Supplementary Figure 3.** The calibration plot showed good agreement between the predicted and observed probabilities. (A) node size, (B) mean stiffness, (C) max stiffness, and (D) elasticity ratio of lymph nodes when micro-metastasis is regarded as metastatic nodes.
